# Supplementary material for: All-in-one Cu-mediated Ag-assembled nanocomposites for photothermal-assisted photo/chemical dynamic therapy with hypoxia relief and enhanced reactive oxygen species
Source: Royal Society of Chemistry journal article supplement (doi:10.1039/d2nj04525g), 2022-01-01
Supplement: d2nj04525g1.pdf [file d2nj04525g1.pdf]

**All-in-One Cu Mediated Ag assemble Nanocomposites for Photothermal Assisted  
Photo/Chemical Dynamic Therapy with Hypoxia Relief and Reactive Oxygen  
Species Enhanced**

Ping Zhou<sup>a,b</sup>, Xianming Zhang<sup>a,b</sup>, Qinghua Yu<sup>d</sup>, Shiyu Yang<sup>a,b</sup>, Jiashan Xia<sup>a,b</sup>, Tao  
Deng<sup>\*a,b</sup>, and Chao Yu<sup>\*a,b,c</sup>

<sup>a</sup> Research Center of Pharmaceutical Preparations and Nanomedicine, College of  
Pharmacy, Chongqing Medical University, Chongqing 400016, China

<sup>b</sup> Chongqing Key Laboratory for Pharmaceutical Metabolism Research, College of  
Pharmacy, Chongqing 400016, China

<sup>c</sup> Chongqing Pharmacodynamic Evaluation Engineering Technology Research Center,  
College of Pharmacy, Chongqing 400016, China

<sup>d</sup> Department of Pharmacy, Chongqing University Cancer Hospital, Chongqing  
400000, China

\* Corresponding authors at: College of Pharmacy, Chongqing Medical University,  
Chongqing 400016, P. R. China

Assoc. Prof. T. Deng: E-mail: 190444@cqmu.edu.cn

Prof. C. Yu: E-mail: yuchao@cqmu.edu.cn

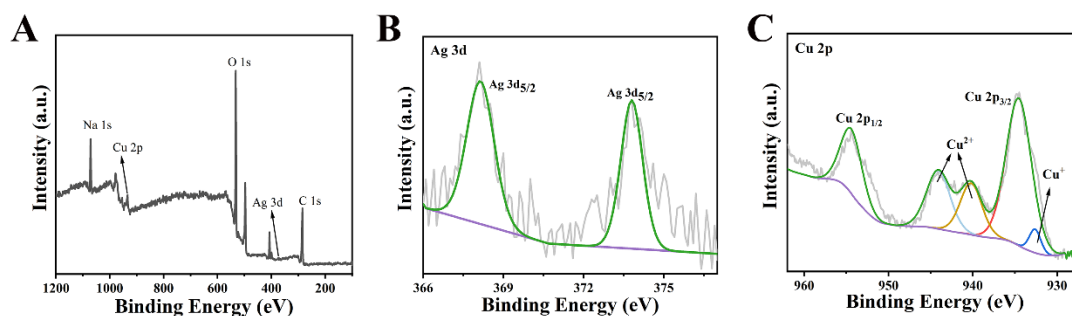

**Figure S1.** The XPS spectra of Ag@Cu. (A)survey spectrum, (B) Ag 3d, (C) Cu 2p.

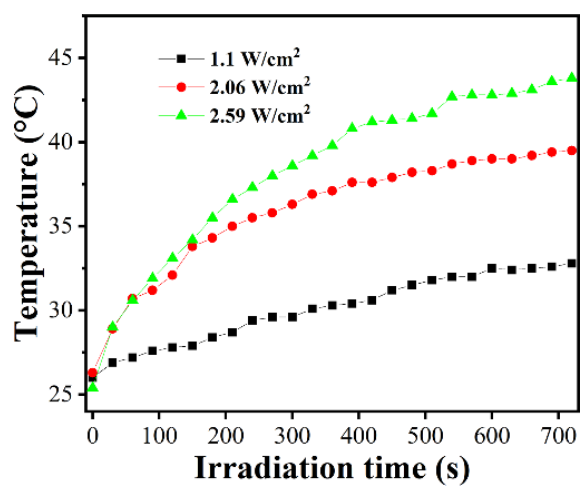

**Figure S2.** Temperature changes of Ag@Cu (100 µg/ml) under 808 nm laser irradiation with different power densities.

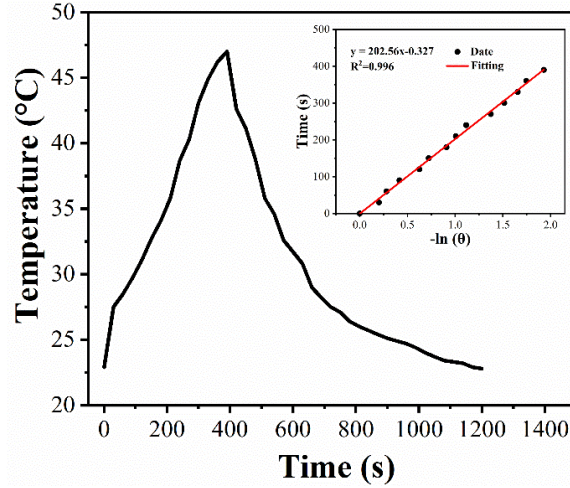

**Figure S3.** Photothermal effect of Ag@Cu was recorded with the irradiation lasted and then naturally cooled down.

The calculation formula of photothermal conversion efficiency is as follows:

$$\eta = \frac{Q_{sample} - Q_{water}}{I(1 - 10^{-A_{808}})} = \frac{hs(\Delta T_{sample} - \Delta T_{water})}{I(1 - 10^{-A_{808}})}$$

$\Delta_{sample} - \Delta_{water}$  can be calculated from

$$\Delta_{sample} - \Delta_{water} = (T_{max(sample)} - T_{surr(sample)}) - (T_{max(water)} - T_{surr(water)})$$

When  $\Delta_{sample} - \Delta_{water}$  was 22.1 °C,  $I$  was 2.59 W/cm<sup>2</sup> and  $A_{808}$  was 0.593. According to Figure X,  $\tau_s$  was determined to be 202.56 s.  $hs$  was calculated from

$$hs = \frac{m_D C_D}{\tau_s}$$

When  $m_D$  was 1 g and  $C_D$  was 4.2 J·g<sup>-1</sup>·°C<sup>-1</sup>. The photothermal conversion efficiency was calculated to be 23.8%.

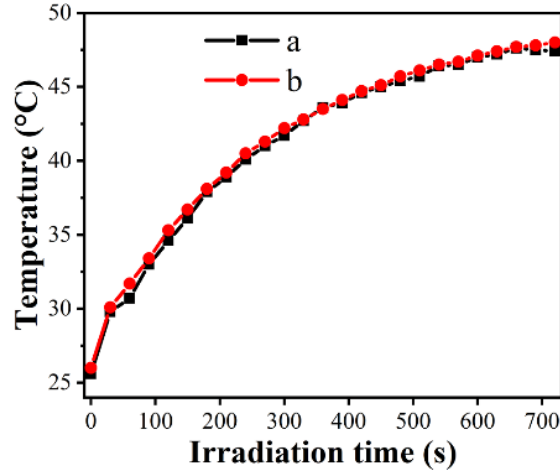

**Figure S4.** Photothermal stability of Ag@Cu. After (a) without or (b) with 660 nm laser irradiation for 10 min, the Ag@Cu was treated with 808 nm laser irradiation for 12 min.

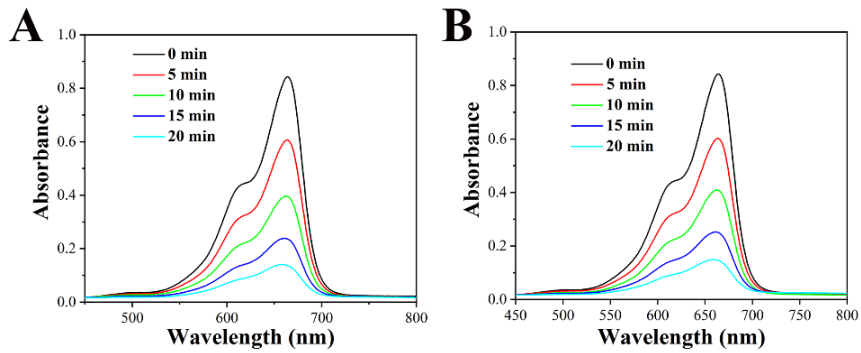

**Figure S5.** MB degradation by  $\cdot\text{OH}$  generated by Ag@Cu, which was treated (A) without or (B) with 808 nm irradiation for 10 min, then it was treated with 660 nm laser irradiation.

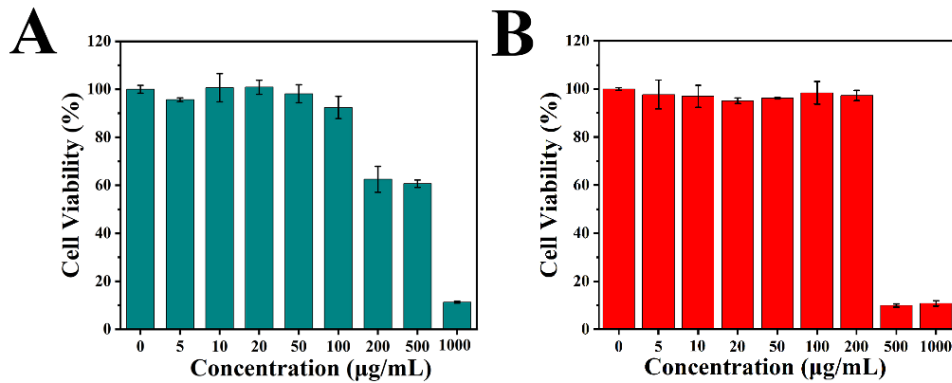

**Figure S6.** MTT assay of 4T1 cells (A) and HUVEC cells (B) treated with different concentrations of Ag@Cu (0, 5, 10, 50, 100, 200, 500 and 1000  $\mu\text{g/mL}$ ).

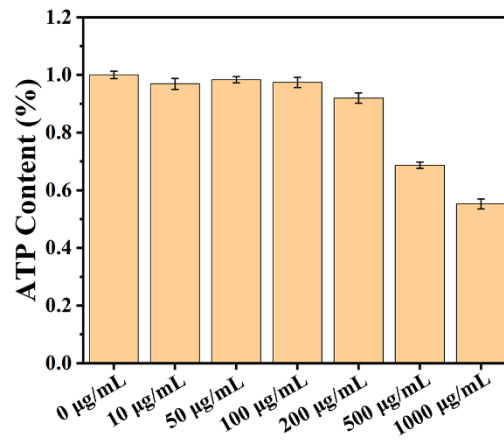

**Figure S7.** ATP depletion by treated with different concentrations of Ag@Cu (0, 10, 50, 100, 200, 500 and 1000 µg/mL).

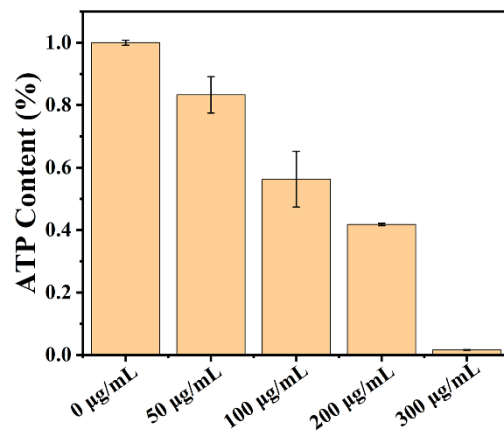

**Figure S8.** The ATP content of 4T1 cells treated with different concentrations of Ag@Cu (0, 5, 50, 100, 200 and 300 µg/mL).

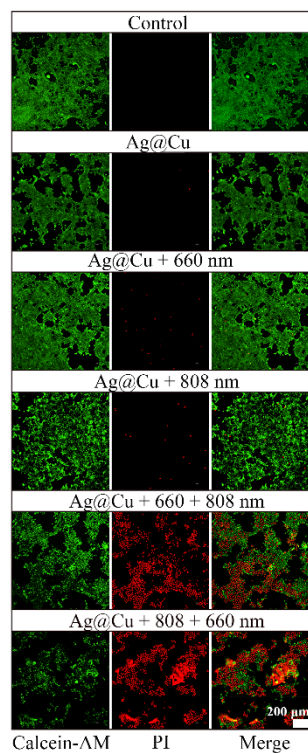

**Figure S9.** Microscopy images dyed with calcein-AM and PI of 4T1 cells treated with PBS or Ag@Cu (50  $\mu\text{g}/\text{mL}$ ) (scale bar = 200  $\mu\text{m}$ ).

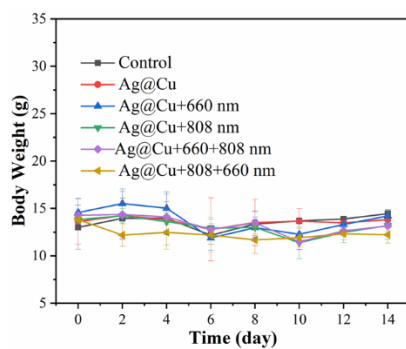

**Figure S10.** The body weight of BALB/c mice bearing 4T1 from different treatment groups.

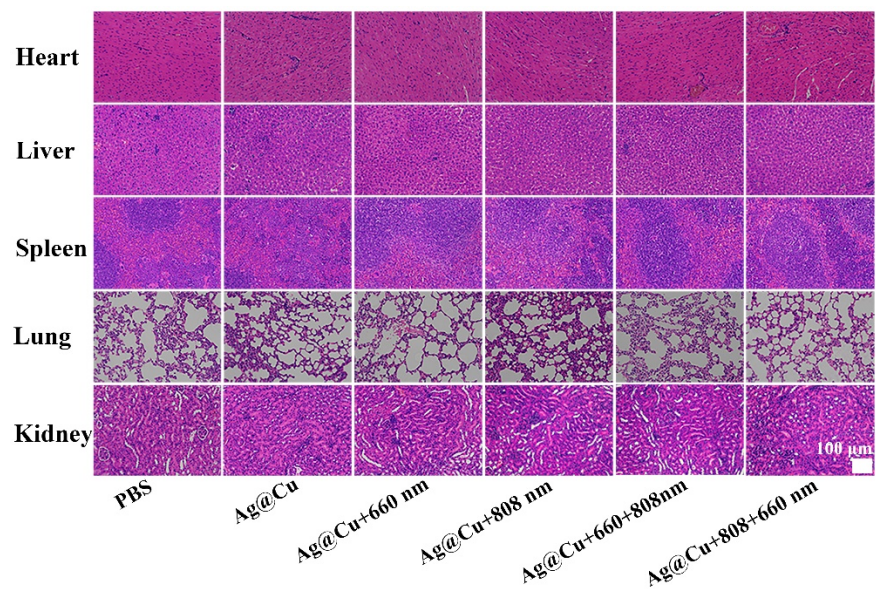

**Figure S11.** HE images of normal tissues in BALB/c mice after systematic injection of different groups (scale bar = 100  $\mu\text{m}$ ).
